# Supplementary material for: Integrative analysis of transcriptomic and proteomic data of Shewanella oneidensis : missing value imputation using temporal datasets
Source: Royal Society of Chemistry journal article supplement (doi:10.1039/c0mb00260g), 2011-01-07
Supplement: c0mb00260g.pdf [file c0mb00260g.pdf]

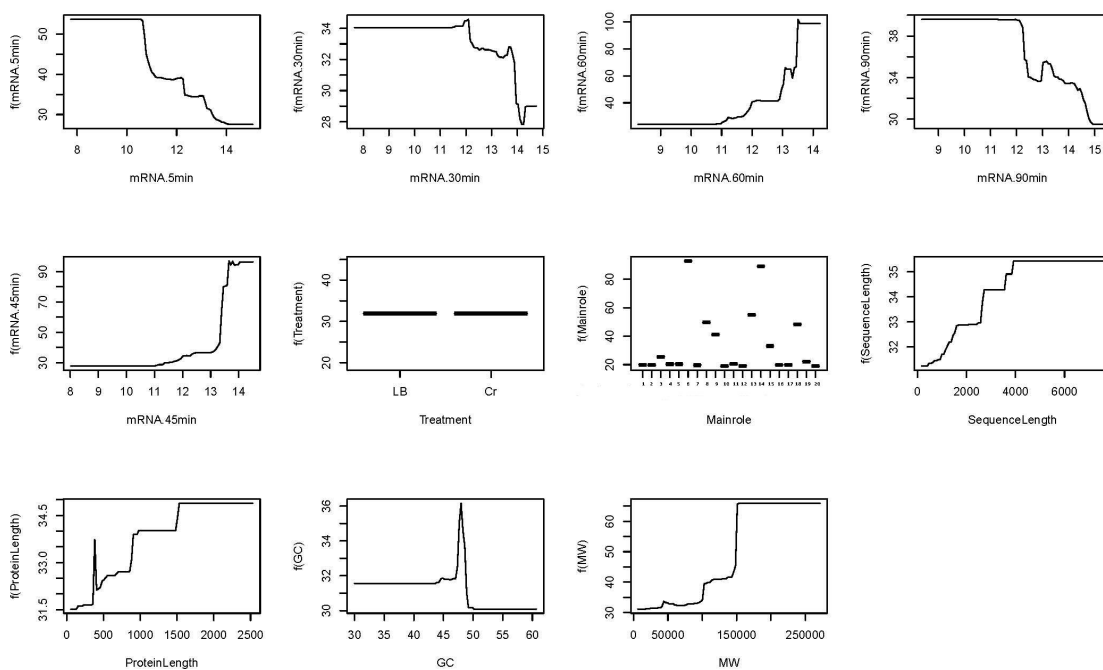

**Supplementary Figure 1:** Partial Dependency Plots: Every graph depicts the partial dependency prediction values for each of the 11 predictors used in the nonlinear model when predicting protein abundance at 90-min.

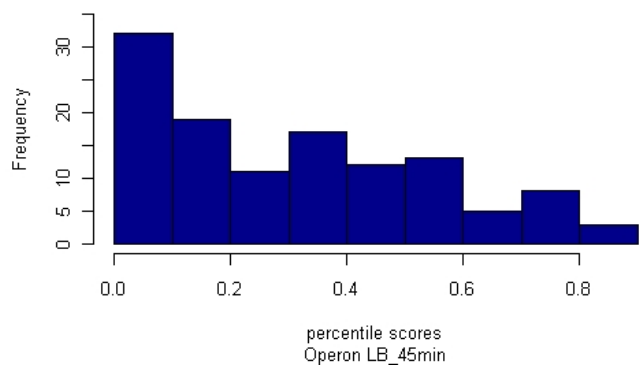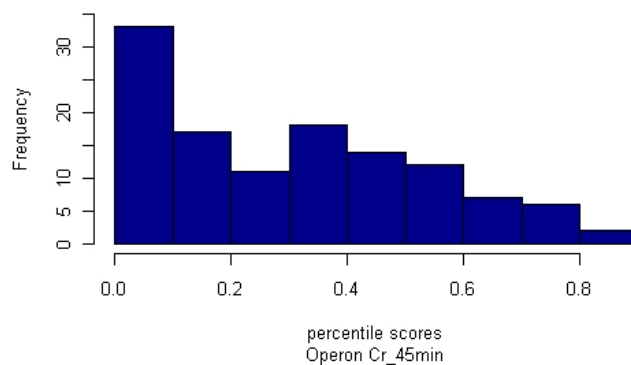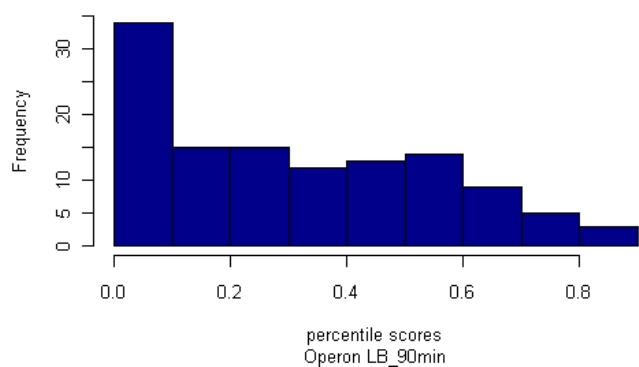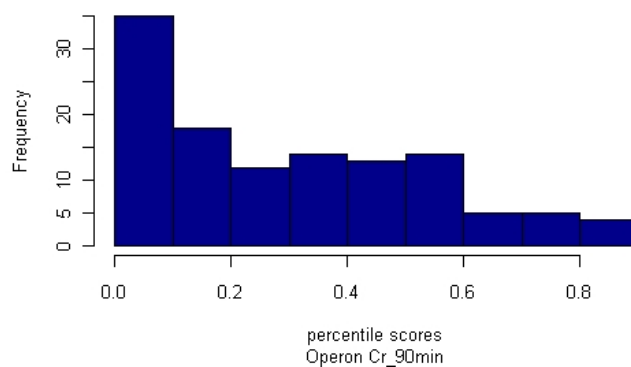

**Supplementary Figure 2:** Model Validation: Percentile Scores for CV values of operon groups

**Supplementary Table 1:** Model validation: mRNA abundance predictions at 45 minutes in some operons groups

| Operon |               | mRNA at 45min |                     |       |                     |
|--------|---------------|---------------|---------------------|-------|---------------------|
|        |               | LB            |                     | Cr    |                     |
|        |               | CV            | PCV <sub>mean</sub> | CV    | PCV <sub>mean</sub> |
| 1:     | SO0003-SO0009 | 0.924         | 0.573 <sup>#</sup>  | 0.928 | 0.574 <sup>#</sup>  |
| 2:     | SO0023-SO0032 | 0.458         | 0.579               | 0.453 | 0.579               |
| 3:     | SO0066-SO0074 | 0.47          | 0.579               | 0.464 | 0.579               |
| 4:     | SO0101-SO0109 | 0.78          | 0.579 <sup>#</sup>  | 0.785 | 0.579 <sup>#</sup>  |
| 5:     | SO0163-SO0181 | 0.536         | 0.619               | 0.526 | 0.611               |
| 6:     | SO0182-SO0189 | 0.711         | 0.573 <sup>#</sup>  | 0.699 | 0.574 <sup>#</sup>  |
| 7:     | SO0218-SO0229 | 0.605         | 0.608               | 0.604 | 0.605               |
| 8:     | SO0230-SO0257 | 0.476         | 0.629               | 0.454 | 0.621               |
| 9:     | SO0258-SO0269 | 0.435         | 0.579               | 0.418 | 0.579               |
| 10:    | SO0272-SO0285 | 0.481         | 0.593               | 0.47  | 0.584               |
| 11:    | SO0286-SO0300 | 0.535         | 0.597               | 0.532 | 0.595               |
| 12:    | SO0311-SO0318 | 0.787         | 0.556 <sup>#</sup>  | 0.772 | 0.544 <sup>#</sup>  |
| 13:    | SO0342-SO0346 | 0.388         | 0.556               | 0.39  | 0.544               |
| 14:    | SO0395-SO0401 | 0.29          | 0.556               | 0.288 | 0.544               |
| 15:    | SO0441-SO0456 | 0.822         | 0.579 <sup>#</sup>  | 0.809 | 0.579 <sup>#</sup>  |
| 16:    | SO0476-SO0488 | 0.349         | 0.608               | 0.347 | 0.605               |
| 17:    | SO0532-SO0536 | 0.573         | 0.556 <sup>#</sup>  | 0.538 | 0.544               |
| 18:    | SO0599-SO0606 | 0.742         | 0.594 <sup>#</sup>  | 0.728 | 0.583 <sup>#</sup>  |
| 19:    | SO0608-SO0612 | 0.364         | 0.556               | 0.37  | 0.544               |
| 20:    | SO0639-SO0652 | 0.53          | 0.579               | 0.52  | 0.579               |
| 21:    | SO0656-SO0672 | 0.445         | 0.593               | 0.432 | 0.584               |
| 22:    | SO0674-SO0690 | 0.839         | 0.597 <sup>#</sup>  | 0.856 | 0.595 <sup>#</sup>  |
| 23:    | SO0712-SO0718 | 0.628         | 0.503 <sup>#</sup>  | 0.573 | 0.512               |
| 24:    | SO0842-SO0849 | 0.929         | 0.556 <sup>#</sup>  | 0.92  | 0.544 <sup>#</sup>  |
| 25:    | SO0850-SO0854 | 0.445         | 0.556               | 0.444 | 0.544               |
| 26:    | SO0877-SO0883 | 0.563         | 0.556 <sup>#</sup>  | 0.559 | 0.544 <sup>#</sup>  |
| 27:    | SO0900-SO0909 | 0.3           | 0.573               | 0.296 | 0.574               |
| 28:    | SO1008-SO1021 | 0.538         | 0.606               | 0.536 | 0.595               |
| 29:    | SO1103-SO1110 | 0.703         | 0.594 <sup>#</sup>  | 0.719 | 0.583 <sup>#</sup>  |
| 30:    | SO1155-SO1163 | 0.644         | 0.573 <sup>#</sup>  | 0.623 | 0.574 <sup>#</sup>  |

Coefficient of Variation (CV) is computed by dividing standard deviation by the mean of the prediction values for protein abundance for a specific set of genes (group). The protein prediction values were normalized by molecular weight before CV calculation. More details in Materials and Methods Section.

\* CV values of selected operons based on predicted protein abundance from various experimental conditions are listed.

\*\* PCV<sub>mean</sub> is the mean of CV values computed through permutation test for selected operons.

# CV values that is greater than the PCVmean.

Supplementary Table 2. Model Validation: Protein abundance predictions at 45 and 90 minutes in some operons groups \*

| Operon |               | Protein 45 min |                     |       |                    | Protein 90 min |                    |       |                    |
|--------|---------------|----------------|---------------------|-------|--------------------|----------------|--------------------|-------|--------------------|
|        |               | LB             |                     | Cr    |                    | LB             |                    | Cr    |                    |
|        |               | CV             | PCV <sub>mean</sub> | CV    | PCV <sub>mea</sub> | CV             | PCV <sub>mea</sub> | CV    | PCV <sub>mea</sub> |
| 1:     | SO0003-SO0009 | 0.759          | 0.699 <sup>#</sup>  | 0.908 | 0.705 <sup>#</sup> | 0.824          | 0.675 <sup>#</sup> | 0.88  | 0.674 <sup>#</sup> |
| 2:     | SO0023-SO0032 | 0.618          | 0.807               | 0.559 | 0.772              | 0.627          | 0.786              | 0.555 | 0.738              |
| 3:     | SO0066-SO0074 | 0.419          | 0.951               | 0.425 | 0.907              | 0.402          | 0.889              | 0.406 | 0.883              |
| 4:     | SO0163-SO0181 | 0.624          | 0.951               | 0.64  | 0.907              | 0.559          | 0.889              | 0.561 | 0.883              |
| 5:     | SO0182-SO0189 | 0.416          | 0.878               | 0.418 | 0.833              | 0.432          | 0.826              | 0.432 | 0.792              |
| 6:     | SO0218-SO0229 | 0.537          | 1.188               | 0.547 | 1.101              | 0.524          | 1.132              | 0.522 | 1.059              |
| 7:     | SO0230-SO0257 | 0.401          | 1.37                | 0.425 | 1.308              | 0.418          | 1.315              | 0.471 | 1.205              |
| 8:     | SO0258-SO0269 | 0.447          | 1.092               | 0.463 | 1.022              | 0.474          | 1.06               | 0.497 | 0.976              |
| 9:     | SO0272-SO0285 | 0.374          | 1.022               | 0.377 | 0.983              | 0.395          | 0.99               | 0.398 | 0.937              |
| 10:    | SO0286-SO0300 | 0.703          | 1.092               | 0.637 | 1.022              | 0.731          | 1.06               | 0.67  | 0.976              |
| 11:    | SO0311-SO0318 | 0.786          | 0.807               | 0.786 | 0.772              | 0.781          | 0.786              | 0.781 | 0.738 <sup>#</sup> |
| 12:    | SO0342-SO0346 | 0.282          | 0.699               | 0.265 | 0.705              | 0.219          | 0.675              | 0.212 | 0.674              |
| 13:    | SO0395-SO0401 | 0.774          | 0.807               | 0.512 | 0.772              | 0.77           | 0.786              | 0.572 | 0.738              |
| 14:    | SO0441-SO0456 | 0.585          | 1.092               | 0.585 | 1.022              | 0.537          | 1.06               | 0.537 | 0.976              |
| 15:    | SO0476-SO0488 | 0.651          | 0.577 <sup>#</sup>  | 0.651 | 0.556 <sup>#</sup> | 0.654          | 0.565 <sup>#</sup> | 0.654 | 0.551 <sup>#</sup> |
| 16:    | SO0532-SO0536 | 0.859          | 0.951               | 0.829 | 0.907              | 0.795          | 0.889              | 0.762 | 0.883              |
| 17:    | SO0599-SO0606 | 0.374          | 0.699               | 0.382 | 0.705              | 0.405          | 0.675              | 0.415 | 0.674              |
| 18:    | SO0608-SO0612 | 0.226          | 0.878               | 0.226 | 0.833              | 0.224          | 0.826              | 0.224 | 0.792              |
| 19:    | SO0639-SO0652 | 0.35           | 0.577               | 0.35  | 0.556              | 0.352          | 0.565              | 0.352 | 0.551              |
| 20:    | SO0656-SO0672 | 0.862          | 0.878               | 0.862 | 0.833 <sup>#</sup> | 0.855          | 0.826 <sup>#</sup> | 0.856 | 0.792 <sup>#</sup> |
| 21:    | SO0674-SO0690 | 0.621          | 0.577 <sup>#</sup>  | 0.621 | 0.556 <sup>#</sup> | 0.609          | 0.565 <sup>#</sup> | 0.609 | 0.551 <sup>#</sup> |
| 22:    | SO0842-SO0849 | 0.233          | 0.807               | 0.209 | 0.772              | 0.218          | 0.786              | 0.213 | 0.738              |
| 23:    | SO0850-SO0854 | 0.405          | 0.577               | 0.45  | 0.556              | 0.437          | 0.565              | 0.453 | 0.551              |
| 24:    | SO0877-SO0883 | 0.474          | 0.699               | 0.474 | 0.705              | 0.392          | 0.675              | 0.392 | 0.674              |
| 25:    | SO0900-SO0909 | 0.564          | 1.01                | 0.583 | 0.92               | 0.556          | 0.969              | 0.571 | 0.922              |
| 26:    | SO1008-SO1021 | 0.453          | 1.092               | 0.463 | 1.022              | 0.422          | 1.06               | 0.441 | 0.976              |
| 27:    | SO1103-SO1110 | 1.158          | 0.807 <sup>#</sup>  | 1.158 | 0.772 <sup>#</sup> | 0.867          | 0.786 <sup>#</sup> | 0.867 | 0.738 <sup>#</sup> |
| 28:    | SO1155-SO1163 | 0.33           | 0.577               | 0.33  | 0.556              | 0.334          | 0.565              | 0.334 | 0.551              |

Coefficient of Variation (CV) is computed by dividing standard deviation by the mean of the prediction values for protein abundance for a specific set of genes (group). The protein prediction values were normalized by molecular weight before CV calculation. More details in Methods section.

\* CV values of selected operons based on predicted protein abundance from various experimental conditions are listed.

\*\* PCV<sub>mean</sub> is the mean of CV values computed through permutation test for selected operons.

# CV values that is greater than the PCVmean.

**Supplementary Table 3. Description of the dataset used in this study**

|                                                        |                                                                                                                |
|--------------------------------------------------------|----------------------------------------------------------------------------------------------------------------|
| Organism                                               | <i>Shewanella oneidensis</i>                                                                                   |
| Conditions                                             | LB (Control) and Cr (Chromate Stress)                                                                          |
| Number of Variables<br>{Variables}                     | 12<br>{mRNA at 5-,30-,45-,60-,90-min,<br>Mainrole, GC, MW, Sequence Length,<br>Protein Length, Treatment, Dye} |
| Number of replicates (mRNA<br>abundance)               | 6/gene (2 dyes ea. per condition)                                                                              |
| Number of genes analyzed                               | 4516 for both conditions                                                                                       |
| Quality of mRNA replicates<br>{Pearson Correlation}    | {0.85-0.98}                                                                                                    |
| Number of replicates (protein<br>abundance)            | 2/gene per condition                                                                                           |
| Number of genes analyzed                               | 2447 for both conditions                                                                                       |
| Quality of protein replicates<br>{Pearson Correlation} | {0.91-0.99}                                                                                                    |
